# Supplementary material for: Characterization of Organic Thin Film Solar Cells of PCDTBT : PC71BM Prepared by Different Mixing Ratio and Effect of Hole Transport Layer
Source: Hindawi journal article supplement (doi:10.1155/2015/687678), 2015-01-01
Supplement: f1 [file 687678.f1.docx]

**
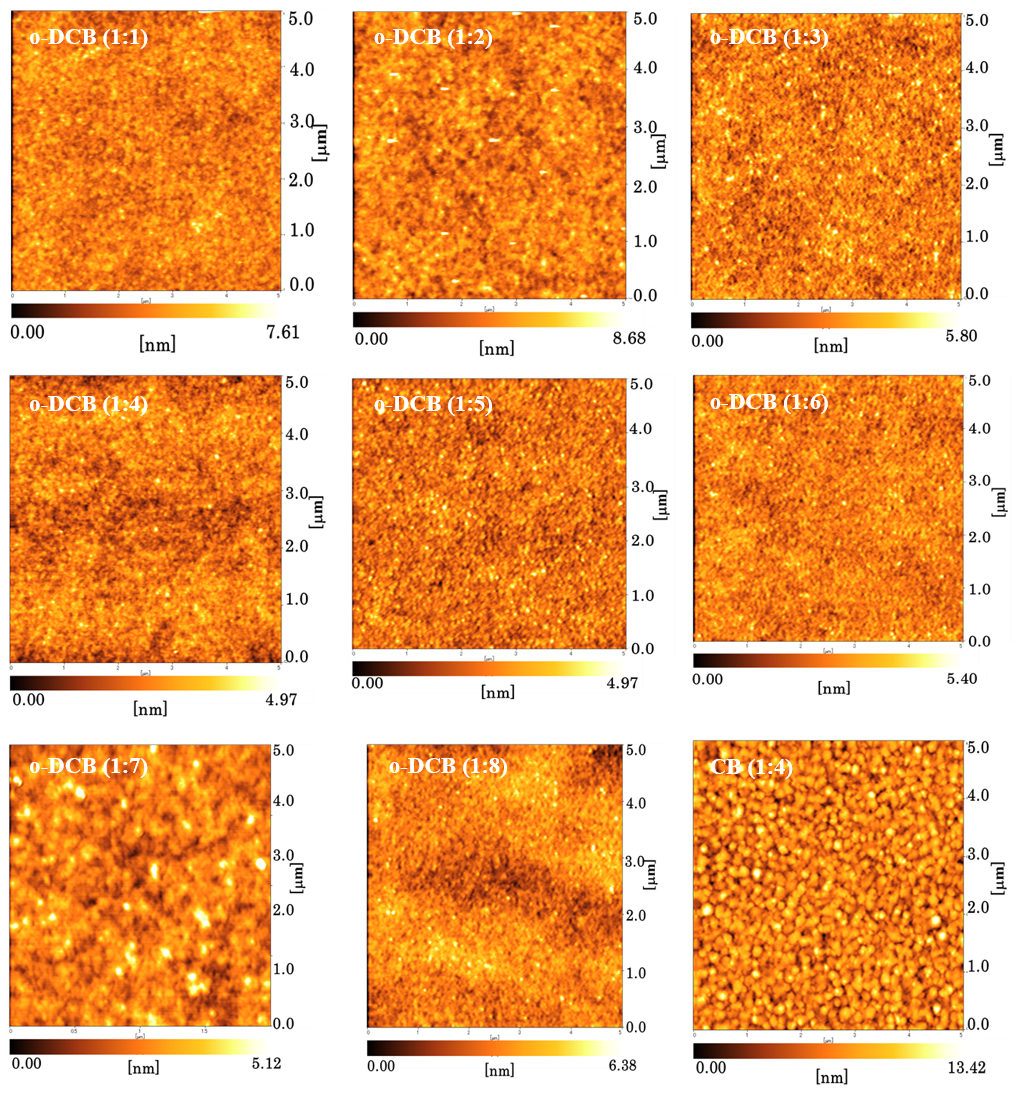
**

FIGURE S1: AFM images of the PCDTBT: PC71BM prepared with blend ratios (1:1 to 1:8) of PCDTBT and PC71BM in o-ODCB and CB.
